# Supplementary material for: Management of dental disease in eared seals (family Otariidae): a Delphi approach
Source: Front Vet Sci. 2025 Aug 26;12:1619326. doi: 10.3389/fvets.2025.1619326 (PMC12418202; doi:10.3389/fvets.2025.1619326)
Supplement: Supplementary file 2 [file Table_2.xlsx]

## Sheet: Sheet1
Questionnaire 1		Questionnaire 2
Name and Technical Qualifications		Name and Technical Qualifications
Name:		Name:
Q1: My technical qualifications include (select all that apply):		Q1: My technical qualifications include (select all that apply):
Certificate holder (e.g. GPCert (SADen&OS)		This question does not require follow-up in round 2. This space is provided for any optional comments.
Diplomate (e.g. DAVDC, DEVDC)
General practitioner
Zoo veterinarian
Other advanced dentistry degree
Other
Species Experience		Species Experience
Q2: I have experience managing dental disease in California sea lions (Zalophus californianus).		Q2: I have experience managing dental disease in California sea lions (Zalophus californianus).
Yes		This question does not require follow-up in round 2. This space is provided for any optional comments.
No
Q3: I have experience managing dental disease in other otariid species (e.g. South American sea lions, fur seals, etc.) If you select 'yes', please fill in the species names you have worked with in the next section.		Q3: I have experience managing dental disease in other otariid species (e.g. South American sea lions, fur seals, etc.) If you select 'yes', please fill in the species names you have worked with in the next section.
Yes		This question does not require follow-up in round 2. This space is provided for any optional comments.
No
Q3A: Please fill in the species names you have worked with (optional):
Q4: How many dental procedures have you performed on otariids? (Multiple procedures on the same animal count as separate procedures)		Q4: How many dental procedures have you performed on otariids? (Multiple procedures on the same animal count as separate procedures)
2025-01-05		This question does not require follow-up in round 2. This space is provided for any optional comments.
2025-06-10
More than 10 procedures
Oral Lesions		Oral Lesions
Q5: I see the following oral lesions in sea lion patients (1 = most frequent, 5 = least frequent. N/A = have no observed).		Q5: I see the following oral lesions in sea lion patients. Participants added the following answers: "tooth abrasion", "peripheral odontogenic fibroma ("epulis")", "pulp granuloma", "odontogenic cyst", "heavy calculus", "mucosal ulceration", "soft tissue trauma". *Keeping the lesions in mind that participants already evaluated in round 1, please rank the new lesions with how frequently you have o…
Draining tracts		Tooth abrasion
Jaw fractures		Peripheral odontogenic fibroma ("epulis")
Malformation		Pulp granuloma
Missing teeth		Odontogenic cyst
Neoplasia/cancer		Heavy calculus
Periodontal disease		Mucosal ulceration
Supernumerary teeth		Soft tissue trauma
Tooth fractures
Tooth resorption
Q5A: Please add any oral lesions that have not been listed, as well as your ranking of how frequently you observe them (1 = most frequent, 5 = least frequent). Feel free to add as many details or thoughts as you would like.		Q5A: *Many of these new additions are rare findings; if you have seen them, please elaborate on them in the comments below - location in mouth, appearance, etc.) This space is provided for any optional comments.
Q6: I perceive the following risk factors to be associated with the lesions identified in the previous question: Rank each suggested factor with how strongly associated they are to the lesions (1 = strongest association, 5 = weakest association, N/A = have not observed). Add your own factors in the next section.		Q6: I perceive the following risk factors to be associated with the lesions identified in the previous question: Rank each suggested factor with how strongly associated they are to the lesions (1 = strongest association, 5 = weakest association, N/A = have not observed). Add your own factors in the next section.
Chewing on foreign objects		This question does not require follow-up in round 2. This space is provided for any optional comments.
Early weaning
Fighting (with conspecifics)
Idiopathic/unknown cause
Restraint (squeeze cages, nets)
Self-mutilation
Work/performance-related injury
Q6A: Please add any risk factors that have not been listed, as well as your ranking of how strongly they are associated with the lesions (1 = strongest association, 5 = weakest association). Feel free to add as many details or thoughts as you would like.
Q7: If I observe the following I will recommend an intervention: Rank each suggested factor with how likely you are to recommend an intervention (1 = strongest recommendation, 5 = weakest recommendation, N/A = would not recommend intervention). Add your own factors in the next section.		Q7: If I observe the following I will recommend an intervention: Participant responses did not achieve consensus for 'malocclusion'. In addition, participants added the following answers: sneezing, nasal discharge, hemorrhage. *Keeping the factors in mind that have already achieved consensus, please rank the suggested factors with how likely you are to recommend an intervention (1 = strongest rec…
Apical infection/draining tract		Malocclusion *that is causing trauma*
Behavior change		Sneezing
Facial swelling		Nasal discharge
Gingival recession		Hemorrhage
Inflammatory mucosa
Malocclusion (e.g. misplaced teeth, TMJ, etc.)
Mass/growth
Mobile teeth
Shortened crown (e.g. abrasion, attrition, fracture, pulp exposure, etc.)
Q7A: Please add any factors that have not been listed, as well as your ranking of how strongly you would recommend intervention (1 = strongest recommendation, 5 = weakest recommendation). Feel free to add as many details or thoughts as you would like.		Q7A: Please consider whether you are in agreement with the consensus of the group for the items that achieved consensus in the previous round. Please use this space for any comments about either the consensus or the new questions posed.
Planning and Preparation		Planning and Preparation
Q8: When planning for a procedure I make sure that I take these steps to prepare: Rank each suggested factor with how likely you are to recommend a preparation (1 = strongest recommendation, 5 = weakest recommendation, N/A = I would not recommend this for preparation). Add your own factors in the next section.		Q8: When planning for a procedure I make sure that I take these steps to prepare: Participant responses did not achieve consensus for the following: "review patient chart/record", "mentally prepare", and "prepare backup equipment". In addition, participants added the following answers: "discuss expectations and plan with team members/staff". *The steering committee feels it would be helpful to cl…
Mentally prepare		Review patient charts/records
Prepare backup equipment		Mentally prepare
Prepare equipment list		Prepare backup equipment
Review patient charts/records		Discuss expectations and plan with team members/staff
Research specific anatomy
Take pre-procedure radiographs
Q8A: Please add any preparation steps that have not been listed, as well as your ranking of how likely you are to recommend a preparation (1 = strongest recommendation, 5 = weakest recommendation). Feel free to add as many details as you would like.		Q8A: Please consider whether you are in agreement with the consensus of the group for the items that achieved consensus in the previous round. Please use this space for any comments about either the consensus or the new questions posed.
Q9: When planning for a procedure I request agreement on a maximum procedure time ("cut off" time):		Q9: When planning for a procedure I request agreement on a maximum procedure time ("cut off" time): This question did not achieve consensus. Given the large divide here, the steering committee recommends trialing the following best practice statement: "There is no consensus on whether a specific maximum procedure time should be established. Discussing all of the factors that impact procedure time…
Yes		1 (Strongly agree)
No		2
		3
		4
		5 (Strongly disagree)
Q9A: Please list the maximum procedure time. Feel free to add as many additional thoughts and details as you would like.		Q9A: Please use this space to provide optional comments on the statment, consensus, etc.
Q10: How important was it to consult with dental specialists with experience working with this species before your procedure?		Q10: How important was it to consult with dental specialists with experience working with this species before your procedure? This question did not achieve consensus. *The steering committee feels that it would be helpful to clarify this statement to emphasize "prior to your first procedure", as some of the divide may have been related to consultation no longer being a benefit to those with exten…
1 (Extremely important)		1 (Extremely important)
2		2
3		3
4		4
5 (Not at all important/I did not consult with any specialists)		5 (Not at all important/I did not consult with any specialists)
Q10A: Please share any thoughts, details or case experiences that you feel are relevant (optional).		Q10A: Please use this space to provide optional comments about the question.
Q11: How important was the presence of a veterinary anesthetist with experience working with this species?		Q11: How important was the presence of a veterinary anesthetist with experience working with this species? Participant responses achieved consensus. *The expert panel feels that, because consensus was achieved that the group understands the importance of managing anesthesia as part of a successful procedure. We also want to highlight that there were many comments about its importance, and that al…
1 (Extremely important)		This question does not require follow-up in round 2. This space is provided for any optional comments.
2
3
4
5 (Not at all important/I did not use a specialized anesthetist)
Q11A: Please share any thoughts, details or case experiences that you feel are relevant (optional).		Q11A: Please consider whether you are in consensus with the group for the item listed. Please use this space for any additional comments.
Q12: If I request *pre-procedure* imaging, I prefer the following: Rank each suggested intervention with how strongly you prefer it (1 = strongest preference, 5 = weakest preference, N/A = I would not recommend this approach)		Q12: If I request *pre-procedure* imaging, I prefer the following: *Participant responses did not achieve consensus for these statements. *The steering committee feels that it would be helpful to separate and clarify these statements - see multiple questions below. For "I do not prefer pre-procedure imaging and prefer to take my own intraoral radiographs", *suggested clarification: "given the cha…
Anesthetized pre-procedure intraoral radiographs		Questions were separated for clarity; see below.
I do not prefer pre-procedure imaging and prefer to take my own intraoral radiographs during the procedure
Voluntary (awake) intraoral radiographs
Voluntary (awake) skull radiographs
Q12 (This question was separated into several sections in round 2)		Q12: Clarification on the statement "I do not prefer pre-procedure imaging and prefer to take my own intraoral radiographs": *Keeping in mind participant responses from round 1, please consider the statement, "given the challenge of performing high quality, diagnostic radiographs, I welcome pre-procedure imaging, but will generally take my own intraoral radiographs prior to performing work." Rank…
Q12 (This question was separated into several sections in round 2)		Q12: Follow-up from round 1: *Keeping in mind participant responses to this question from round 1, please rank these suggested interventions with how strongly you prefer them (1 = strongest preference, 5 = weakest preference, N/A = I would not recommend this approach).
		Voluntary (awake) *intraoral* radiographs
		Computed tomography (CT or CBCT)
Q12 (This question was separated into several sections in round 2)		Q12: Clarification on the statement "anesthetized pre-procedure *intraoral radiographs* (separate procedure)", which did not achieve consensus. The steering committee suggests working towards a consensus against a separate anesthetic procedure: "a separate anesthesia is typically *not* recommended because dentists will perform their own radiographs during the procedure". Please rank this statemen…
		A separate anesthesia is typically *not* recommended because dentists will perform their own radiographs during the procedure.
Q12A: Please add any interventions that have not been listed, as well as your ranking of how strongly you prefer it (1 = strongest preference, 5 = weakest preference). Feel free to add as many details or thoughts as you would like.		Q12A: Please use this space to provide optional comments on the statement, consensus, etc.
Intervention Strategies		Intervention Strategies
Q13: If a non-vital or pulp-exposed tooth requires intervention I would recommend these techniques: Rank each suggested factor with how strongly you are likely to recommend an intervention (1 = strongest recommendation, 5 = weakest recommendation, N/A = I would not recommend this technique). Add your own factors in the next section.		Q13: If a non-vital or pulp-exposed tooth requires intervention I would recommend these techniques: Participants did not achieve consensus for the following: "endodontic therapies". The steering committee felt that more detail is needed to clarify, and suggests working towards a consensus against endodontic therapy, except in select cases. Please consider the following statement: "endodontics sho…
Extraction		Endodontics should only be used in select cases where the following criteria are met: closed apex, lack of resorption, etc., and where radiographic follow-up is possible with the animal.
Endodontic therapies
Q13A: Please add any techniques that have not been listed, as well as your ranking of how important a technique is (1 = strongest recommendation, 5 = weakest recommendation). Feel free to add as many details or thoughts as you would like.		Q13A: Please use this space to provide optional comments on the statement, consensus, etc.
Q14: If a periodontal disease-affected tooth requires intervention I would recommend these techniques: Rank each factor with how strongly you are likely to recommend an intervention (1 = strongest recommendation, 5 = weakest recommendation, N/A = I would not recommend this technique). Add your own factors in the next section.		Q14: If a periodontal disease-affected tooth requires intervention I would recommend these techniques: Consensus was not achieved for these statements: "extraction" and "periodontal therapies". The steering committee felt that more clarification is necessary for these statements. Please consider the slightly revised statements below. Rank each factor with how strongly you are likely to recommend …
Extraction		Extraction *of moderate to advanced periodontal disease*
Periodontal therapies		*Minor* periodontal therapies *(e.g. debriding of pockets)
		*Advanced* periodontal therapies *(e.g. guided tissue regeneration or sliding tissue flap)
Q14A: Please add any techniquest that have not been listed, as well as your ranking of how important a technique is (1 = strongest recommendation, 5 = weakest recommendation). Feel free to add as many details or thoughts as you would like.		Q14A: Please use this space to provide optional comments about the question.
Q15: If many teeth are affected, I would prefer to address them in the following ways: Rank each suggested intervention with how strongly you are likely to recommend it (1 = strongest recommendation, 5 = weakest recommendation, N/A = I would not recommend this approach). Add your own interventions in the next section.		Q15: If many teeth are affected, I would prefer to address them in the following ways: Consensus was not achieved, but was closest for this statement: "address most severe issues first, and stage procedures until complete (triage plus staging)". Consensus is unlikely to be achieved for the other statements: "staged procedures (staging only)", "address all issues at once", "address only most sever…
Address all issues at once		I prefer to address the most severe issues first, and stage procedures until complete (triage plus staging)
Address only most severe issues (triage only)
Address most severe issues first, and stage procedures until complete (triage plus staging)
Staged procedures (staging only)
Q15A: Please add any interventions that have not been listed, as well as your ranking of how strongly you are to recommend it (1 = strongest recommendation, 5 = weakest recommendation). Feel free to add as many details or thoughts as you would like.		Q15A: Please use this space to provide optional comments on the statement, consensus, etc.
Procedural Details		Procedural Details
Q16: When I extract sea lion teeth, the following details are important for me to keep in mind: Rank each factor with how important it is (1 = most important, 5 = least important, N/A = I would not recommend this approach). Add your own factors in the next section.		Q16: When I extract sea lion teeth, the following details are important for me to keep in mind: We did not achieve consensus on these responses. For most of the factors, the steering committee felt that specific details provided towards best practices will be more useful than achieving consensus on a statement.
Whether a specialized elevator technique is needed		This question does not require follow-up in round 2. This space is provided for any optional comments.
Whether or not to use a surgical flap
Necessity of extracting associated teeth
Whether or not to use bone graft
Q16A: Please add any factors that have not been listed, as well as your ranking of how important it is (1 = most important, 5 = least important, N/A = this factor is not a concern to me). Add your own factors in the next section.		Q16A: Please add any additional details that you feel are important to be included in best practices about extraction.
Q16 (This question was separated into several sections in round 2)		Q16: Follow up on bone graft. The one factor that trended towards a consensus against was the use of bone graft: "whether bone graft is necessary". In order to clarify responses on this, we have added two options for N/A: "N/A: I have not used/do not use bone graft", and "N/A - I specifically recommend "against* the use of bone graft". Please rank each factor with how important it is (1 = most im…
		I recommend using bone graft
Q17: When I extract sea lion teeth, the following anatomic challenges are important for me to keep in mind: Rank each factor with how important it is (1 = most important, 5 = least important, N/A = this factor is not a concern to me).		Q17: When I extract sea lion teeth, the following anatomic challenges are important for me to keep in mind: We did not achieve consensus on these responses. For most of the factors, the steering committee felt that specific details provided towards best practices will be more useful than achieving consensus on a statement.
Alveolar bone characteristics		This question does not require follow-up in round 2. This space is provided for any optional comments.
Apex diameter
Crown:root ratio
Opposing teeth
Root length
Root number
Root shape or associated structures
Q17A: Please add any anatomic challenges that have not been listed, as well as your ranking of how important they are (1 = most important, 5 = least important). Feel free to add as many details or thoughts as you would like.		Q17A: Please add any additional details that you feel are important to be included in best practices about otariid anatomy.
Q18: When I use local anesthetics, these factors are important to me: Rank each factor with how important it is (1 = most important, 5 = least important, N/A = this factor does not influence my use of local anesthetics). Add your own factors in the next section.		Q18: When I use local anesthetics, these factors are important to me: There was consensus on the following factor: "local block site". The steering committee suggests the following statement for consensus: "a local or regional block is recommended when performing a procedure likely to cause post-operative pain". Consensus was nearly complete with the following factors: "local anesthetic dose", "l…
Local anesthetic drug		A local or regional block is recommended when performing a procedure likely to cause post-operative pain.
Local anesthetic dose
Local block site
Q18A: Please add any local anesthetic factors that have not been listed, as well as your ranking of how important they are (1 = most important, 5 = least important). *It is particularly helpful for you to share drug names, drug dosages, etc.		Q18A: Please use this space to provide optional comments on the statement, consensus, or participant comments.
Q19: When I use antibiotics, these factors are important to me: Rank each factor with how important it is (1 = most important, 5 = least important, N/A = I would not recommend this approach). Add your own factors in the next section.		Q19: When I use antibiotics, these factors are important to me: Consensus is unlikely to be achieved for any of the statements about antibiotics. The steering committee feels that working towards a consensus statement *against* prophylactic antibiotics is warranted. Please consider the following statement: "in general, prophylactic antibiotic use is not recommended for dental procedures. Judiciou…
Intraoperative parenteral antibiotic		In general, prophylactic antibiotic use is not recommended for dental procedures. Judicious antibiotic use may be needed for specific cases that warrant it.
Intraoperative topical/local antibiotic
Preoperative oral antibiotic
Postoperative parenteral antibiotic
Postoperative oral antibiotic
Postoperative topical/local antibiotic
Q19A: Please add any antibiotic factors that have not been listed, as well as your ranking of how important they are (1 = most important, 5 = least important). *It is particularly helpful for you to share drug names, drug dosages, etc.		Q19A: Please use this space to provide optional comments on the statement, consensus, or participant comments.
Q20: When I close an extraction site, these factors are important to me: Rank each factor with how important it is (1 = most important, 5 = least important, N/A = this factor does not influence my closure approach). Add your own factors in the next section.		Q20: When I close an extraction site, these factors are important to me: Consensus was achieved on the following factors: "suture material", "suture size". Consensus was nearly achieved on "closure pattern". The steering committee felt that specific details provided towards best practices would be more useful than achieving consensus on these factors.
Suture material		This question does not require follow-up in round 2. This space is provided for any optional comments.
Suture size
Closure pattern
Q20A: Please add any closure factors that have not been listed, as well as your ranking of how important they are (1 = most important, 5 = least important). *It is particularly helpful for you to share suture material types, sizes, closure patterns, etc.		Q20A: Please use this space to discuss participant comments, or to provide your own additional comments.
Postoperative Considerations		Postoperative Considerations
Q21: When an animal is recovering from an intervention, I would expect the following postoperative care factors to be important for a positive outcome: Rank each factor with how important it is (1 = most important, 5 = least important, N/A = I do not recommend this postoperatively). Add your own factors in the next section.		Q21: When an animal is recovering from an intervention, I would expect the following postoperative care factors to be important for a positive outcome: further consensus is needed for: "photodocumentation". Participant response trended towards consensus agains for "laser therapy". Consensus is unlikely for these factors, which will be omitted: "restricting water access", "oral rinses". Please see…
Analgesia		Questions were separated for clarity; see below.
Laser therapy
Oral rinses
Photodocumentation
Restricting access to toys/cribbing objects
Restricting water access
Q21A: Please add any postoperative care factors that have not been listed, as well as your ranking of how important they are (1 = most important, 5 = least important). *It is particularly helpful for you to share details about your recommendations such as number of days of dry docking, types of analgesia, etc.		Q21: Follow-up from round 1: *Keeping in mind participant responses to photodocumentation as near-consensus in round 1, please rank it with how important it is (1 = most important, 5 = least important, N/A = I do not recommend this postoperatively).
		Photodocumentation
Q21 (This question was separated into several sections in round 2)		Q21: Follow-up from round 1: Participant response trended toward consensus *against* for "laser therapy". The steering committee would like to clarify this as *therapeutic (cold, low level, or diode) laser therapy. Keeping in mind participants' responses, please rank this factor with how important it is (1 = most important, 5 = least important). *Note that two "N/A" categories have been added: "N…
		Therapeutic (cold, low level, or diode) laser therapy
Q22: When *planning for a procedure*, I *expected* to see the following complications: Rank each factor with your ranking of how strongly you expected to encounter these complications (1 = highest expectation, 5 = lowest expectation, N/A = I did not expect this complication). Add your own factors in the next section.		Q22: When *planning for a procedure*, I *expected* to see the following complications:
Behavioral breakdown		This question does not require follow-up in round 2. This space is provided for any optional comments.
Bony sequestra
Inappetence
Infection
Pain
Wound dehiscence
Q22A: Please add any complications that have not been listed, as well as your ranking of how strongly you expected to encounter these complications (1 = highest expectation, 5 = lowest expectation). *It is particularly helpful for you to share details about your experiences or even the experiences you have heard from other colleagues.
Q23: *After the procedure*, I *experienced* these complications: Rank each factor with your ranking of how frequently you experienced it (1 = most frequent, 5 = least frequent, N/A = I have not experienced this compilcation). Add your own factors in the next section.		Q23: *After the procedure*, I *experienced* these complications:
Behavioral breakdown		This question does not require follow-up in round 2. This space is provided for any optional comments.
Bony sequestra
Inappetence
Infection
Pain
Wound dehiscence
Q23A: Please add any complications that have not been listed, as well as your ranking of how strongly you expected to encounter these complications (1 = highest expectation, 5 = lowest expectation). *It is particularly helpful for you to share details about your experiences or even the experiences you have heard from other colleagues.
Q24: During recovery, I recommend the follow post-operative or follow-up surveillance: Rank each factor with your ranking of how strongly you recommend it (1 = strongest recommendation, 5 = weakest recommendation, N/A = I would not recommend this approach). Add your own factors in the next section.		Q24: During recovery, I recommend the follow post-operative or follow-up surveillance: further consensus is needed for: "visual observation by veterinarians". Participant response trended towards consensus agains for "restrained or anesthetized follow-up". Consensus is unlikely for these factors, which will be omitted: "visual observation by dentists". Please see below for follow up.
Photographs		Questions were separated for clarity; see below.
Restrained/anesthetized follow-up
Visual observation by keepers/trainers
Visual observation by dentists
Visual observation by veterinarians
Q24A: Please add any postoperative surveillance factors that have not been listed, as well as your ranking of how strongly you expected to encounter these complications (1 = highest expectation, 5 = lowest expectation). *It is particularly helpful for you to share details about your experiences or even the experiences you have heard from other colleagues.		Q24A: Follow-up from round 1: *Keeping in mind participant responses to "visual observation by veterinarians" as near-consensus in round 1, please rank it with how important it is (1 = most important, 5 = least important, N/A = I do not recommend this postoperatively).
		Visual observation by veterinarians
Q24 (This question was separated into several sections in round 2)		Q24: Follow-up from round 1: Participant response trended toward consensus *against* for "restrained/anesthetized follow-up". Keeping in mind participants' responses, please rank this factor with how strongly you recommend it (1 = strongest recommendation, 5 = weakest recommendation, N/A = I would not recommend this postoperatively). *The steering committee feels that separating this out to only …
		Anesthetized follow-up
Q25: When I think of a case that I would consider a treatment success, I consider these to be the most clinically relevant outcomes: Rank each factor with your ranking of how imporant the outcome is (1 = most important, 5 = least important, N/A = I do not consider this factor relevant). Add your own factors in the next section.		Q25: When I think of a case that I would consider a treatment success, I consider these to be the most clinically relevant outcomes: further consensus needed on "function" and "client satisfaction". Consensus unlikely on "aesthetics" and will be removed. Considering the near consensus of these factors, rank each factor with how imporant the outcome is (1 = most important, 5 = least important, N/A…
Aesthetics		Client satisfaction
Client satisfaction		Function
Function
Inflammation/infection (resolution)
Jaw stability
Pain (resolution)
Q25A: Please add any relevant outcomes that have not been listed, as well as your ranking of how strongly you expected to encounter these complications (1 = highest expectation, 5 = lowest expectation). *It is particularly helpful for you to share details about your experiences or even the experiences you have heard from other colleagues.		Q25A: Please use this space to provide optional comments on the consensus, participant comments, etc.
Q26: Financial constraints have impacted the management of my cases:		Q26: Financial constraints have impacted the management of my cases:
Financial constraints have been a barrier to management		This question does not require follow-up in round 2. This space is provided for any optional comments.
Financial constraints have been a delay to management
Financial constraints have been neither a delay nor barrier to management
Q26A: Please provide any additional detail about financial constraints and how you have managed or adapted. (Optional)		Please provide any optional additional comments here.
