# Supplementary material for: Management of dental disease in eared seals (family Otariidae): a Delphi approach
Source: Frontiers journal article supplement (doi:10.3389/fvets.2025.1619326), 2025-08-26
Supplement: Table_3.xlsx [file Table_3.xlsx]

## Sheet: Sheet1
Questionnaire 1
Q5: "I see the following oral lesions in sea lion patients"	[I saw] oropharyngeal hyperplasia/inflammation in one very young fur seal.	Severe periodontal disease in a fur seal, with severe soft tissue inflammation of the palatal mucosa and gingiva that were completely covered by calculus, and lingual erosion/ulceration. All of the soft tissues healed following extraction of most of the teeth.
Q6: "I perceive the following risk factors to be associated with the lesions in the previous question:"	Welfare is the most important. Curbing steriotypic behavior, and monitoring captive animals is essential. Ideally in person. Video monitoring and AI monitoring applications may be developed to monitor behavior and alert trainers / keepers.	Enclosure and objects given for enrichment or chewing need to be evaluated as contibuting factors in tooth trauma. [More discussion is needed] on genetics or diseases that conribute to periodontial disease.	A discussion on [the animal's] function and diet in the wild and in captivity should affect treatment planning.
Q7: "If I observe the following I will recommend an intervention:"	No comments outside of the listed responses
Q8: "When planning for a procedure I take these steps to prepare:"	Practitioners should not overthink or overprepare, as one does not know what one will find until the workup.	[Discussion should include] the risks of the procedure and emergency actions.	[Discussion should include] ensuring each team member understands their roles.	[When reviewing the patient chart], include review of previous anesthesia events in this patient and make relevant changes.	[I recommend] reviewing any biopsy results.	[When researching specific anatomy] review skulls and models, and consider bringing a skull to the procedure room.	Consider acquiring 3D models produced from CT scans from colleagues that are willing to help.
Q9: "When planning for a procedure I request agreement on a maximum procedure time"	The cutoff time can go to more than 4 hours.	I am typically comfortable with 2-3 hours.	There is no specific literature to agree with the safety of a specific length of the procedure. If the patient is stable we continue. If the anesthesia becomes problematic we stop.	I consider the risks of time under anesthesia versus the benefit of treating the disease.	This depends on what the team agrees is best for the patient, and is not a clock decision.	My limit is 2.5 hours.	We normally aim for 1-1.5 hours maximum, but the time varies based on the animal's age, health conditions and anesthesia monitoring.	About 2-3 hours because of difficulties in maintaining body temperature.	Usually around 2 hours, but the decision is left to the veterinarian responsible for the anesthesia.	Unstable anesthesia may mean no procedure at all.	2 hour maximum anesthetic time.	I suggest what time will be required to perform the procedure so that the anesthetist is forewarned.	45 minutes.	2 hours.	Normally 2 hours.	I work with a colleague and we both work on different teeth at the same time, reducing the procedure time overall.	Dependent on the anesthetist.	2 hours.	A maximum time is decided at a pre-procedure meeting.	I do not have a maximum time. It depends on the anesthesia and how stable the patient is.	We establish check in times where new information becomes available regarding diagnostics or treatments and make decisions on time based on that information.
Q10: "How important was it to consult with dental specialists with experience working with this species before your procedure"	I started with a colleague with experience in the field before starting to do it myself.	Few experts exist in the treatment of dental conditions of this species.	Few have the expertise.	There were not many people available to consult with.	On my first patient I called for discussion with more experienced colleagues.	Before my first ever sea lion procedure this was extremely valuable.
Q11: "How important was the presence of a veterinary anesthetist with experience working with the species"	I will never do a procedure without my usual anesthesiologist in this species. It is mandatory.	I will not work on a patient unless I feel the anesthetist is experienced with the species.	It is ideal to have a veterinary anesthesiologist present, but it is not always possible.	I work with a team of fully dedicated vets that recruit me when there is a dental treatment that is needed. They address all pre operative issues and manage anesthesia and recovery.	Anesthesia requires a team, not just one person.	As anesthesia is not my field of expertise an anesthetist is essential to the success of any procedure.	Anesthesia must be managed carefully.	Special knowledge is of utmost importance. I am never responsible for the anesthesia myself.	Vital. Anesthesia is the greatest risk to these species.	I have worked in both situations, and the working environment is much better for everyone involved [if an experienced anesthetist is involved].	[I experienced] fear from trainers regarding anesthesia and dental surgery that delay treatment.
Q12: "If I request pre-procedure imaging I prefer the following:"	I believe that in the future that CBCT will be a big asset.	CBCT	CT, if it is available in some locations	CT may be helpful but such a facility is not available at the zoo	CT imaging is preferable because the team can discuss treatment options based on the images without rushing.	Pre-op CT would be best. It is difficult for zoo teams to get diagnostic quality dental radiographs pre-op.	All radiography is done under general anesthesia to protect not only the animal but the personnel and their safety.	If animals can be screened with intraoral radiographs in an awake state I find it extremely helpful, as we can detect even very early lesions and problems in a timely manner.	Due to the difficulty in anesthetizing these patients I usually plan to obtain diagnostics and treat at the same procedure.	Pre-op photographs are very important to see before planning the procedure.	I always do both awake radiographs and intraoperative radiographs.	Any pre procedure imaging can be useful to guide treatment planning and decision making. I would not recommend anesthetized pre-procedure imaging as this means an increased number of anesthetic episode for the patient. If adequate pre-procedure imaging can be obtained it may avoid the need for an anesthetized examination depending on the pathology being assessed. Conscious screening radiographs a…	If we need to keep the treatment procedure as short as possible, or if there is lots of treatment to do, it is helpful to have good imaging ahead of time, but is not required.	We have a CT at the zoo but it takes a motivated staff and cooperative patient to perform pre-op CT (far superior to radiographs in our fistulous tracts and extraction planning). In fact it takes an experienced individual to image with dental radiographs.	We did not have pre-procedure imaging, but the animal did allow an awake oral exam so we could be prepared.	I would like to confirm once again how important it is to train these animals to awake radiographic examination for diagnosis and follow-ups.
Q13: "If a non-vital or pulp-exposed tooth requires intervention I would recommend these techniques:"	[Extraction versus endodontic therapies] depends on the time of onset. If flushing has been used as treatment for a long time then the only solution is extraction. When sinus tracts are visible already, always extraction.	It depends on the age of the tooth when it was damaged; most have open apexes. Many have failed vital pulpotomy. I have never seen a successful vital pulpotomy.	Factors like age of tooth, periapical pathology, periapical anatomy, etc. all need to be taken into account.	As already published, it has been shown that even chronic pulp exposure may not lead to pulp infection and necrosis in these animals. So, in the past I would have recommended extraction, but now I may choose to monitor these patients - only if we can regularly radiographically monitor the affected teeth. On the other hand, we do not know what the level of pain of individuals with chronic pulp exp…	Most of the cases I see still have an open apex and/or there is a fistulous track. I am also very concerned about the long term exposure of restoration materials under water.	In very young sea lions mandibular fractures can often heal quite well with strong suture stabilization. This can also give a little while they are growing and may or may not need to be removed.	I feel that this species can function well without teeth, with reduced mastication and food processing.	I have tried a few vital pulpotomies. Most were unsuccessful.	We cannot control the animal's behavior to keep the restoration, so I typically extract.	In the case of very fresh or planned pulp exposure perhaps vital pulpotomy could be an option.	I would not recommend one technique over the other. Decision making would be individualised and based on level of pathology and what is most appropriate, desire or wish to avoid monitoring and repeat procedures, ability to adequately monitor an endodontically treated tooth (conscious or anaesthetised radiographs), age and comorbidities of the patient and the individual tooth affected. I believe d…	The anaesthesia will be quite extensive. Based on experience I will prefer to perform a root canal to extract canine teeth as the flaps very commonly tend to break down.	I think good endodontic treatment is possible in sea lions, but appropriate cases must be chosen carefully and are rare.
Q14: "If a periodontal disease-affected tooth requires intervention I would recommend these techniques:"	The treatment depends on the grade of periodontitis. Most otariids can learn to brush teeth which is very important. More information is necessary to fully understand the periodontal disease.	Treatment versus extraction depends on the ability to perform home care (brushing) which is worked into the daily routine. If there will be no home care and the condition is stage 3 or 4 [periodontal disease], the tooth should be extracted.	More information is needed. A periodontal pocket of 5 mm on a canine tooth can get away with a gingivectomy - so the extend of the disease as well as the cause (when known) will affect my choice and not the mere presence of the disease. A further important aspect is the regularity that the animal can be inspected. I tend to be more conservative if they are well looked after and I am close to do a…	More information is needed; what is the cause of the periodontal disease, and how severe is the periodontal disease?	This answer should be based on the degree of periodontal disease. Mild disease may be approached with a conservative approach, but in the case of moderate to severe periodontal disease extraction may be preferred as I do not want to take the chance for failure, chronic pain, and the need for another procedure.	I see more periodontal disease in seals than in sea lions.	[I recommend] tooth brushing to evaluate response prior to extraction. If there is a good response to conscious tooth brushing then periodontal therapy could be considered an option.	For canine teeth I recommend periodontal treatment. For post canine teeth I prefer extractions.	[Depends on whether patient can tolerate] dental care such as brushing or probing.	Choice of treatment varies with degree of periodontal disease and the willingness of the zoo veterinarian to do follow-ups.	Treatment is based on the level of disease, ability for conscious home care and maintenance, willingness to have follow-up interventions and assessment, age and co-morbidities of the patient.	Periodontal therapies (e.g. root debridement, perioceutic) for low grade disease [stage 1] versus periodontal therapies (e.g. graft, etc.) for advanced disease [stage 4]	The vast majority of procedures were made after an evaluation period and specific case evolution. Small actions such as the use of a tooth brush and mouthwash were usually immediately started.
Q15: "If many teeth are affected, I would prefer to address them in the following ways:"	If I have time, I will continue [the procedure].	The chosen method depends on whether the patient is doing well under anesthesia.	Our intention is always to do all procedures in one sitting. The only time where this has not happened is when an animal is unstable under general anesthesia and needs to be woken up.	The answer may change based on the animal's age and clinical conditions, anesthetic risk, etc.	We try to address all issues at one time but the safety of the animal always comes first.	This is based on individual circumstances. The preference is to do as much as possible in one episode, considering time constraints with anesthesia, recovery of the patient, and willingness to perform multiple procedures.	This will depend on the confidence of the patient doing the general anesthesia and the patient undergoing a general anesthesia.	Depending on how the numerous procedures would affect procedure time and patient recovery, one procedure is great if possible, but may need to be staged for safety or patient comfort.	If the periodontal disease and exposed teeth are too extensive to treat in one session, we directly go for two sessions.
Q16. "When I extract sea lion teeth, the following details are important for me to keep in mind:"	[Also consider] the animal's occupation and/or environment; the animal's established behavioral traits; and the animal's age.	These points of discussion should be between dentists and zoo veterinarians.	I have not used any material in an extracted tooth, especially if it was infected.	Treating the tooth/teeth is the important aspect for me. Creating a flap is a consequence and not a determining factor for me to decide whether I will do it.	[I recommend] culturing lesions for a large microbiological panel including fungi, anaerobics and Mycobacterium.	In my experience extracting canine teeth requires mucogingival flaps and a relatively wide ostectomy as well, and some nearby teeth may also need to be extracted to properly work around the canine's root. Extracting all other teeth is certainly less demanding, and flaps/ostectomy may not be necessary. I personally rarely use bone grafts in extraction sites.	For mandibular canine extraction I always use surgical extraction with a triangular flap and alveolotomy, especially if it is a large specimen. For maxillary canine I can be more conservative but I still create a flap. I do not use any grafts in any cases.	I do not feel that I have enough experience (n=1) extracting teeth to give an honest opinion here.	[Also consider] whether or not to preserve the anatomy.	[Consider] the extent of the alveolectomy.
Q17: "When I extract sea lion teeth, the following anatomic challenges are important for me to keep in mind:"	When extracting a tooth, for me, the most important is the anatomy and any of the maxillofacial structures that may be encountered (infraorbital and mandibular canals), and the health/pathology of the bone.	In some cases the immediate post canine teeth (premolars) are affected too and these are also extracted, the same for third incisors.	The teeth often have a collar which needs to be removed too. The teeth often have an open apex, with or without infection; they need to have the entire tooth structure removed including curetting the apex.	[Consider whether there is] ankylosis, associated neoplasia, or whether post canine tooth roots have a 'swallow-tail effect' with single or twin spaces.	[I recommend] protecting neighboring teeth from trauma during the extraction.	It is common to find ankylosis.	I would not crown these teeth so crown root ratio would not be relevant.	Extracting canines is difficult and requires considerable skill and stamina.	Being aware of the open apex and the collar around the tooth is extremely important. Being aware that mandibular fractures across the apex of mandibular canines in immature sea lions is common and sometimes the canine teeth can survive. It is worth leaving them in place to see is they remain vital.	[Be aware of] the divergence of roots.
Q18: "When I use local anesthetics, these factors are important to me:"	I prefer to use bupivacaine +/- buprenorphine due to increased duration of action, rather than lidocaine, mepivacaine, ropivacaine, etc. I generally use bupivacaine that does not have epinephrine due to concerns about dehiscence. Most commonly, I will use 0.4ml to 0.5ml total volume of 0.5% bupivacaine per site, depending on the patient size.	I only use regional anaesthesia and never local. [I recommend] maxillary nerve block, infraorbital nerve block, inferior alveolar nerve block, and seldomly middle mental nerve block. I never perform a local injection into the periodontal space for a tooth extraction.	In a sea lion, and other large pinnipeds, [I recommend] the local anesthesia dose be based on volume (as in people) instead of mg/kg.	We have used both lidocaine 2% or bupivacaine 0.5% solutions, as infiltration anesthesia, post-extraction splash blocks or as regional blocks.	I use lidocaine and bupivacaine for local anesthesia.	[Consider] associated inflammation, and volume of drug required. [I recommend] an intra-ligamental block.	Dose is not likely to be a concern given the size of the patient, but it is always a consideration. Local anaesthetic type would be dependent on type of procedure and location of the block, and considering potential side effects (e.g. self trauma).	[I recommend] one fast drug to kick in and one to last longer.
Q19: "When I use antibiotics, these factors are important to me:"	[Consider] the type of marine environment where the patient is house; the potential for surgical dehiscence; the purpose for the dental treatment intervention; co-morbidities. I would generally use a penicillin or clindamycin and allow the managing veterinarian to determine the appropriate dosage.	I try to use as little [antibiotics] as possible. If necessary I stay with [amoxicillin-clavulanate]	Generally antibiotics are not necessary as long as the tooth issue is addressed.	I use antibiotics sparingly and always try to take samples if I am concerned. I use a cephalosporin or potentiated amoxycillin I/V during the procedure only.	There is not evidence to support the use of perioperative antibiotics in other species. However, these other species are not swimming in a pool of water after oral surgery. Is there evidence or guidelines in support of perioperative antibiotics in pinnipeds? Osteomyelitis may be an indication for perioperative antibiotics. Periodontal disease is NOT an indication.	The answer depends on the clinical situation. However, in a healthy animal I may not recommend antibiotic therapy or prophylaxis. In case I consider it necessary, it is normally intraoperatively. We have used ampicillin IV or amoxicillin/clavulanic acid either PO or IM.	The choice for antibiotic therapy is on the responsibility of the medical team, not me. However I do recommend the type of antibiotic to be given (mostly clindamycin) and local antiseptic when possible.	Ideally choose the antibiotic based on swab cultures obtained from the conscious animal.	Clindamycin remains my go-to antibiotic at the recommended dose.	[Antibiotic choice] is case dependent.	I rarely use antibiotics in any species. It is assessed case-by-case.	In other species I do not use any antibiotics prior, during or after the procedure, either tooth extraction nor endodontic treatment.
Q20: "When I close an extraction site, these factors are important to me:"	[Consider] tension on the extraction site gingiva; and knot security. I generally use 4-0 Monocryl in simple interrupted or cruciate pattern with 4 to 5 throws. Ties should be loose so that there should be NO blanching of the gum tissue. At large flap sites, I will often add a second layer of closure with a horizontal mattress suture to put the gingival edges in approximation and relieve tension …	[Consider] how the suture material reacts to water [e.g. a marine environment].	Often I will place a mattress to reduce tension on the primary suture line.	Pinniped mucosa is very non-elastic compared to dogs and cats. Even with the best created gingivomucosal flaps I tend to get some dehiscence, which heals by second intention.	[I recommend] loose stitches with monocryl 5/0.	We have used monofilament, resorbable, 4-0 suture material (polyglecaprone, Monocryl), in simple interrupted suture pattern (with several instances of dehiscence and healing by second intention).	I suture extraction sites with 3/0 monofilament gliconite, round body needle, taper cut. suture pattern simples interrupted suture.	I have found that horizontal mattress sutures are less likely to dehisce.	[Consider] tension; the fact that the animal lives in water; and the fact that the animal can destroy the sutures due to stereotypic behavior.	It seems that dehisence is very common no matter the suture or pattern.	[I recommend] polyglicaprone 25, 3-0, reverse cutting 3/8 curve needle. Inverted cross mattress pattern.	It was easy to close the extraction site. The gingiva is very tough.	[I recommend] a simple interrupted pattern.	Tissue preparation would be arguably be the most important factor in ultimate success of wound closure.	I would also consider tension resistance and its timing (depending on suture material). I would recommend PDS over poliglecaprone. Monofilament suture material is a must in oral surgery.	Bigger suture is not better for dehiscence. Smaller suture (4-0) is ideal; it must outlast healing but not last too long. Monofilament is best (Monocryl). I primarily use simple interrupted with some cruciate and/or horizontal mattress support. The key is to tie “loosely” againstvthe gingiva, do not blanch the gums. But good tight knot security.
Q21: "When an animal is recovering from an intervention, I would expect the following postoperative care factors to be important for a positive outcome:"	I have recently started discussing with facilities the potential for dry docking for the first 3 days post-op in extraction cases to see if this improves dehiscence rate. It is very important that the mental health of the animal also be considered as well. In the case of jaw fractures, I strongly encourage dry docking or small pool for a minimum of 7 days. Sedation might be necessary to achieve t…	Analgesia is the most important factor; much more important than antibiotics and all the rest. [I recommend] restricting access to toys and cribbing objects for 7-10 days.	[I recommend] cutting food (fish) into smaller pieces post extraction during the healing period.	[I recommend] daily observation of the extraction sites for healing or complications.	I gave water access after 48 hours for the first procedure, and 24 hours after the second procedure. I was concerned, but he healed well and [it was challenging to keep him dry-docked]	[I recommend] restricting water access just for one or two days, depending on the general animal and lesion observation.	I am not convinced that restricting water access makes a significant difference to tissue healing. I am not sure that oral rinses in an animal living in the water can make a difference either. Laser therapy may be useful but I do not have experience with this in these patients.	After an oral rinse, caregivers usually are able to apply a chorohexidine gel twice daily, because most of these animals are trained. However in a case from another zoo, oral rinses were performed with a water and chlorhexidine solution at a distance, when the animal was out of the water.	[I recommend] tooth brushing and [Photizo light] therapy. Analgesia for 5-7 days, and 24/7 supervision to prevent wound disruption. Dry dock at least 7 days. This can be trained prior to the procedure to reduce stress.	Usually the anesthetist and I let the patient return to function the following day. Return to full feeding may take a few days.	The sea lion wanted to get back in the water immediately upon recovery. There was no keeping him out of the pool so soon after surgery.	[I recommend] dry docking the patient with no water access for 1-2 weeks.
Q22: "When *planning for a procedure*, I *expected* to see the following complications: "	Dehiscence is by far the most common.	With good flap planning, dehiscence is much less than in the beginning. Pain and pain management is the most important. When this is good, behaviour and feeding patterns are normal or even better than before.	Dehiscence is the primary problem, but given time, they heal.	I was concerned about a return to cribbing behavior causing dehiscence but I did not see this occur.	For the first case we did not expect significant postoperative complications, but then we realized that dehiscence develops relatively frequently.	The major complication I see is dehiscence. Even in cases where there is severe infection, they recover very well. I treated only seven cases with extractions and of these 2 experienced dehiscence, and these were the most severe cases - fracture of mandibular canine teeth with infection.	[The animals] usually return to function faster than the trainers anticipate.	I didn’t expect dehiscence the first time but came to expect it as I did more procedures. The expert I consulted prior did not address this with me.	[I recommend] preparing medication doses for all of the listed complications, and in some cases start medications 1 or 2 days prior to the procedure.
Q23: "*After the procedure*, I *experienced* these complications:"	Recurrence in other areas (e.g., pulp exposure from excessive wear) are often tied to behavioral problems that require intervention.	Pain, and pain management is key.	The patient that I treated over a three year time frame developed "odd chewing and swallowing behavior"/dysphagia for 1 year. Unfortunately he died during anesthetic recovery from a work-up for his symptoms. I have requested the post-mortem report to learn if his symptoms could have been related to prior anesthesia for dental treatment, such as esophageal stricture due to silent regurgitation. Th…	[I recommend] preparing medication doses for all of the listed complications, and in some cases start medications 1 or 2 days prior to the procedure.	We experienced dehiscence following mandibular canine extractions (and had successful outcomes for all other extractions). All cases were managed conservatively, and healing happened by second intention within a few weeks. All patients regained normal behavior and eating habits the day following surgery.	In several cases, colleagues reported post operative pain, and we extended pain medications for a couple more days (NSAIDs).	[My patient experienced] ongoing vomiting secondary to chemotherapy.	Be aware that dehiscence is common and usually heals quite well without complications.
Q24: "During recovery, I recommend the following post-operative or follow-up surveillance:"	Restrained follow up is typically not needed unless the animal is not trained.	I always ask facilities to send me photographs post op at 3 days, 1 week, 2 weeks, 3 weeks, 2 months, and 6 months.	Following up with anesthetized procedures will depend on what the original pathology and intervention was. Certainly not for routine tooth extractions. Keepers/curators are very important as first responders to alert the zoo veterinarian of problems.	Usually the dentist just visits for observation a few days after, whenever possible.	I have been lucky to work with very experienced veterinarians and keepers, so I trust that they are able to evaluate the animals in the post-operative period. We have the habit to exchange follow-up pictures and radiographs (taken in the awake patients) whenever indicated, which helps me to confirm the appropriate healing.	I provide the dental health care and monitoring is done at a distance.	If all is going well and healing, minimal interventions are needed.	I will use trainers to show the mouth to vets. If trainers are in charge then good quality photographs will need to be taken so the dentist/vet can evaluate them.	[I recommend] post-operative radiographs [to monitor healing].
Q25: "When I think of a case that I would consider a treatment success, I consider these to be the most clinically relevant outcomes:"	There is no success if all of the factors are not achieved.	I do not consider [function] to be relevant to a clinically successful outcome because they do not need teeth in captivity. In the wild could be another issue.
Q26: "Financial constraints have impacted the management of my cases:"	Everyone wants it for free.	We have worked on a low budget, which has posed some organizational limits and complications. However, luckily we collaborated with a very generous sponsor for equipment and instruments, which has made it possible to perform these procedures.	I don’t charge for my time or materials to rescue organizations.	Most facilities do not have a dentistry budget so I will often treat animals without charging professional fees. Often facilities with create budget entities from the following financial year and then can "afford" to pay for treatment.	I work for the animals in an aquarium or zoo as a volunteer.	None. I volunteer at the local zoo "pro bono" for my dental services.	My job so far is voluntarily done.	I often perform procedures at a significantly reduced rate outside of normal working hours.
